# Supplementary material for: Field evaluation of a novel charge transfer ionization TOF MS for ambient VOC measurements
Source: Copernicus journal article supplement (doi:10.5194/egusphere-2024-2126), 2024-07-31
Supplement: Supplementary file 1 [file egusphere-2024-2126-supplement.pdf]

Supplement of

## Field evaluation of a novel charge transfer ionization TOF MS for ambient VOC measurements

Olga Zografou et al.

Correspondence to: Konstantinos Eleftheriadis ([elefther@ipta.demokritos.gr](mailto:elefther@ipta.demokritos.gr)), Olga Zografou ([o.zografou@ipta.demokritos.gr](mailto:o.zografou@ipta.demokritos.gr))

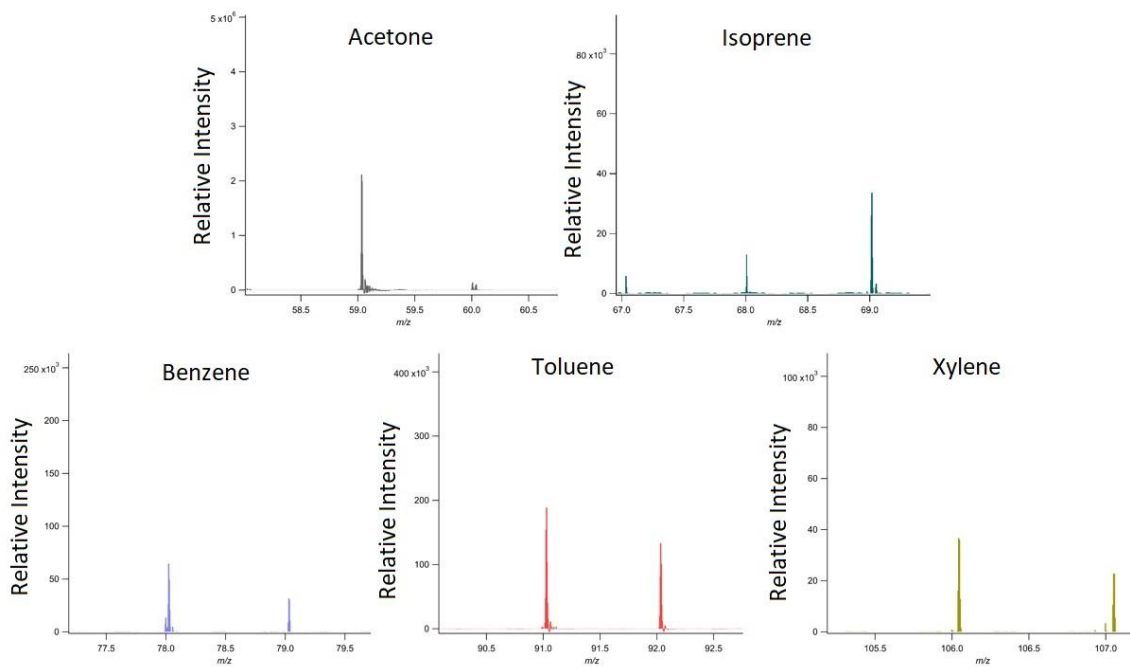

Figure S1. Mass spectra of the VOCs measured in the field campaign at DEM station with the new PTR-oToF-MS (acetone, isoprene, benzene, toluene and xylene).

**Table S1. VOCs concentrations recorded during field deployment in ppb (mean, median, 25th percentile and 75th percentile).**

| Compound | <i>m/z</i>      | Mean conc. (ppb) | Median | 25 <sup>th</sup> percentile | 75 <sup>th</sup> percentile |
|----------|-----------------|------------------|--------|-----------------------------|-----------------------------|
| Acetone  | <b>59.0493</b>  | 2.39             | 2.42   | 1.86                        | 2.96                        |
| Isoprene | <b>69.0697</b>  | 0.77             | 0.70   | 0.48                        | 0.89                        |
| Benzene  | <b>78.0467</b>  | 0.33             | 0.26   | 0.18                        | 0.43                        |
| Toluene  | <b>92.0621</b>  | 0.70             | 0.55   | 0.33                        | 0.89                        |
| o-xylene | <b>106.0784</b> | 0.34             | 0.29   | 0.17                        | 0.49                        |

**Table S2. VOCs uncertainties and mean errors.**

| Compound | <i>m/z</i> | Mean conc. (ppb) | Stdev (ppb) | Mean error (%) |
|----------|------------|------------------|-------------|----------------|
| Acetone  | <b>59</b>  | 2.39             | 0.86        | 36             |
| Isoprene | <b>69</b>  | 0.77             | 0.57        | 74             |
| Benzene  | <b>78</b>  | 0.33             | 0.25        | 76             |
| Toluene  | <b>92</b>  | 0.70             | 0.55        | 78             |
| o-xylene | <b>106</b> | 0.34             | 0.24        | 69             |

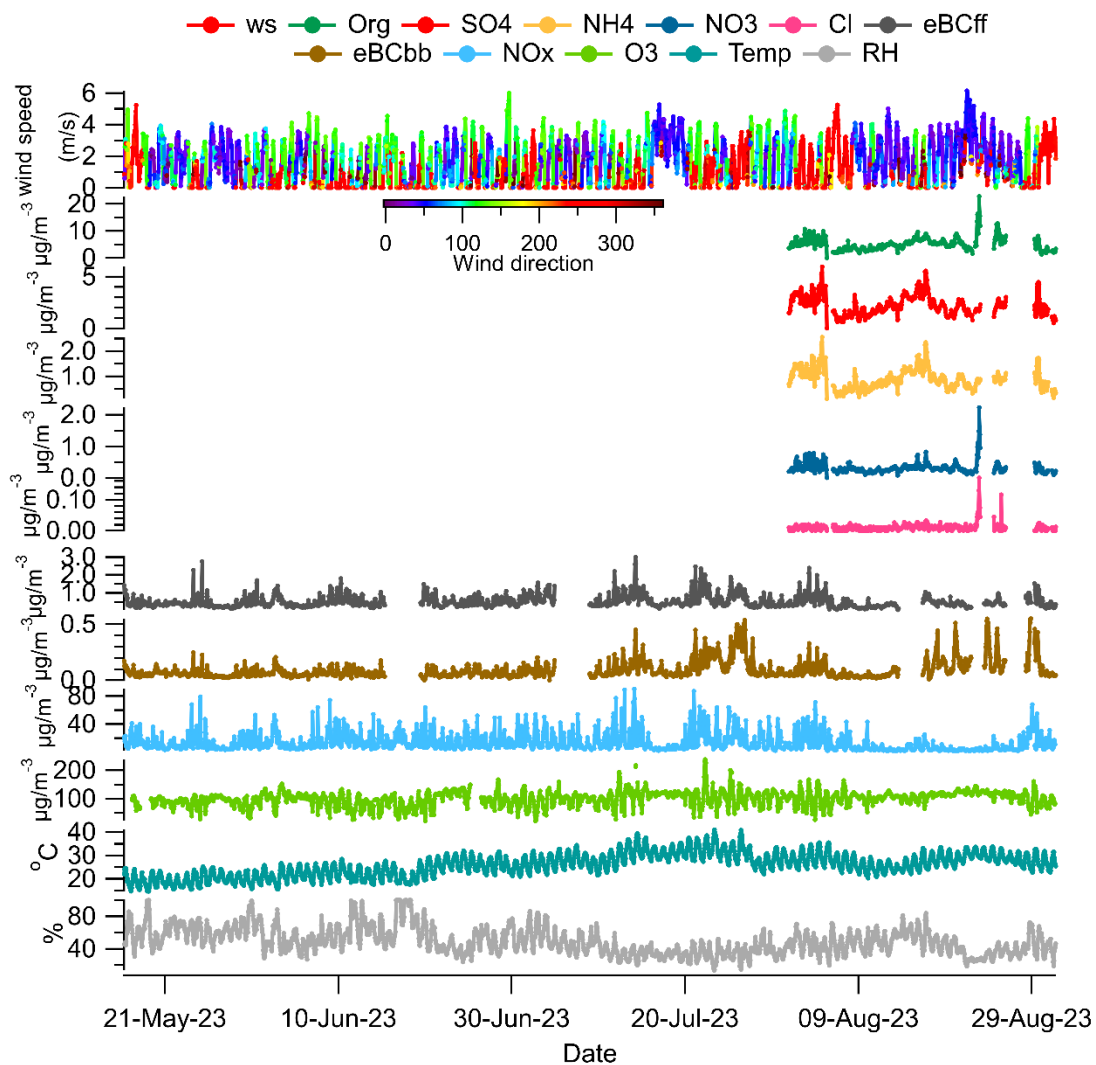

Figure S2. Temporal variability of the complementary data (wind speed, wind direction, ToF-ACSM species (Org, SO4, NH4, NO3 and Cl), eBCff, eBCbb, NOx, and O3). Wind speed is color-coded by the wind direction.

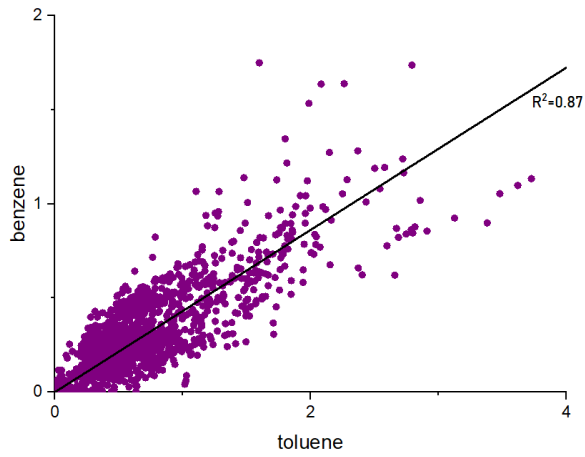

(a)

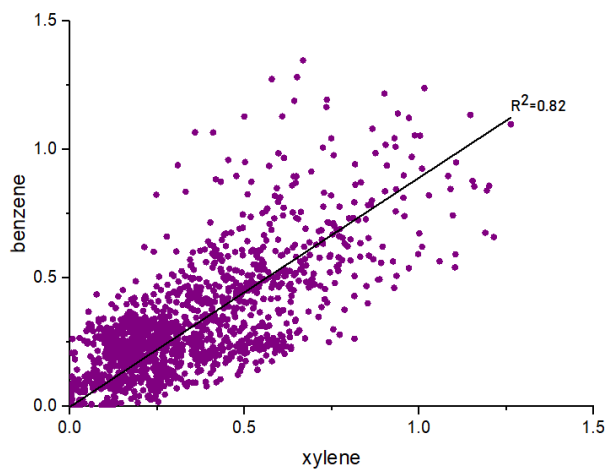

(b)

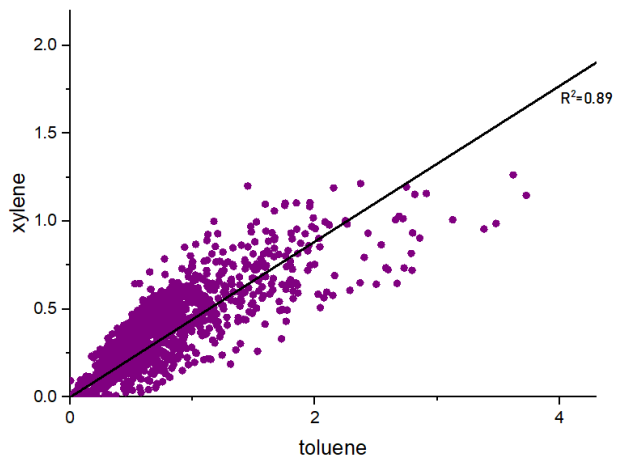

(c)

Figure S3. Scatter plots of the aromatics VOCs (a: benzene vs toluene, b: benzene vs xylene, c: xylene vs toluene).

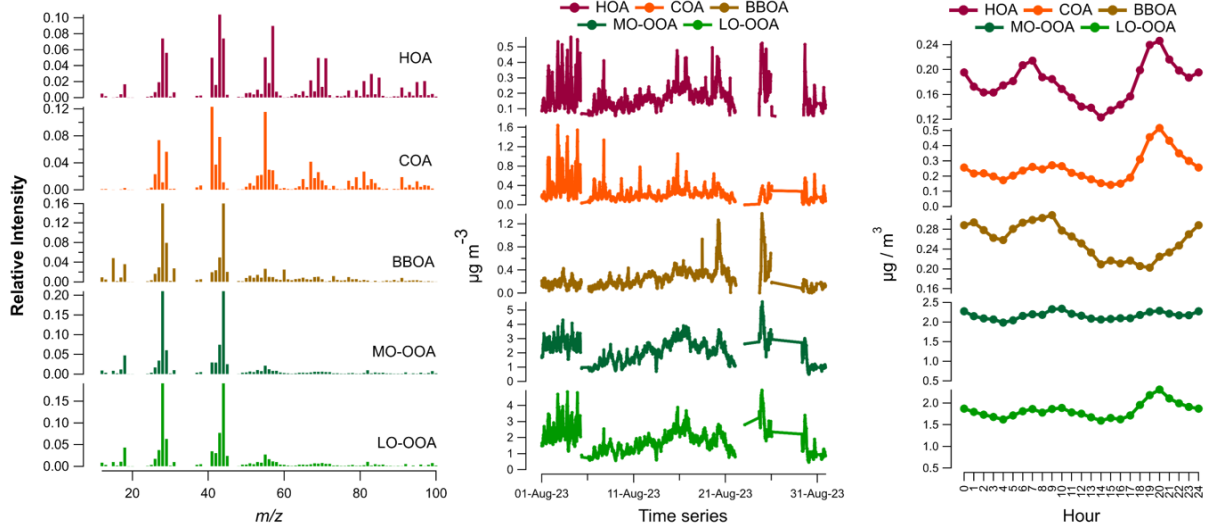

Figure S4. Sources of the organic fraction of PM<sub>1</sub> from the ToF-ACSM as retrieved by the PMF model for the August.

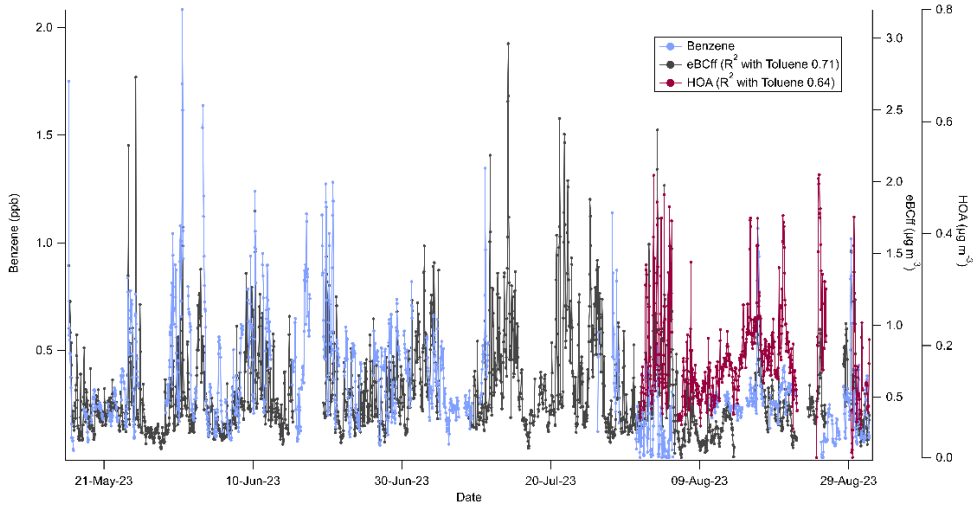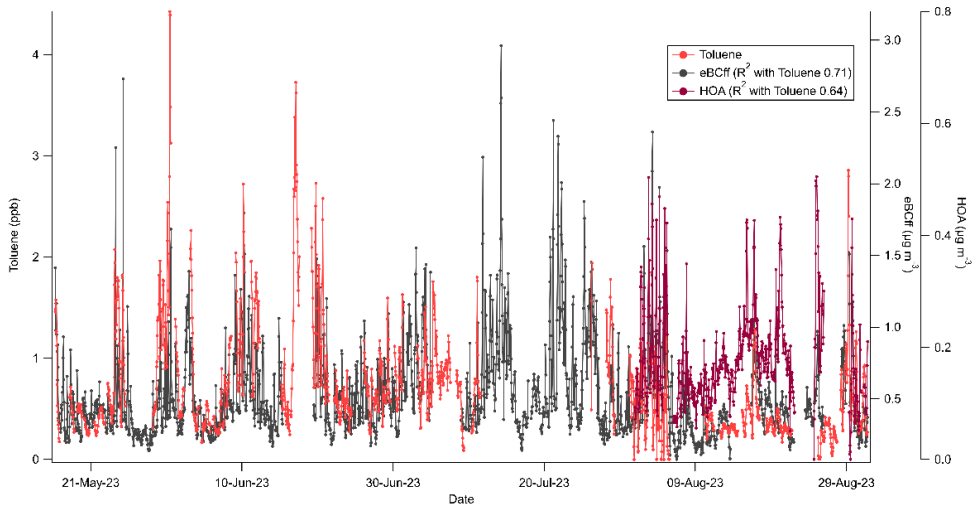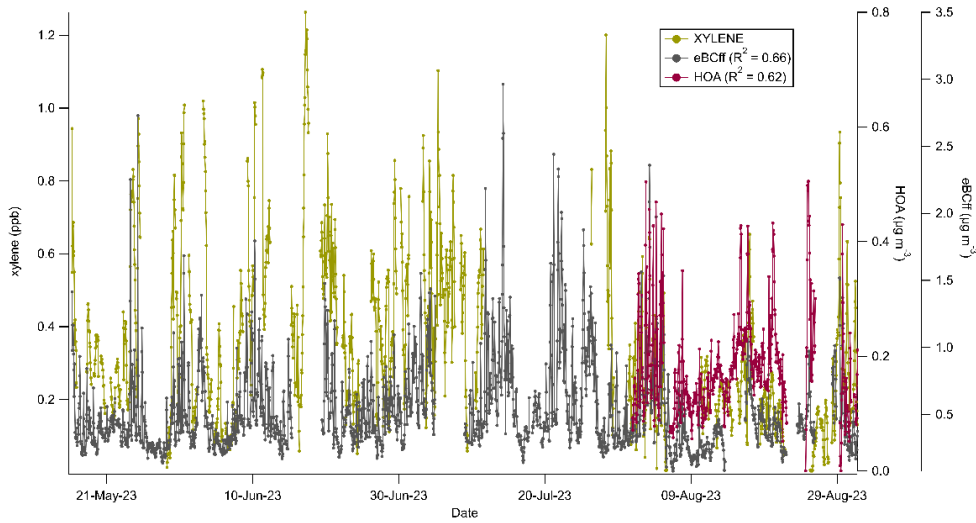

**Figure S5. Time series and R2 of the aromatic VOCs with the traffic-related external data from the Aethalometer and the ACSM.**

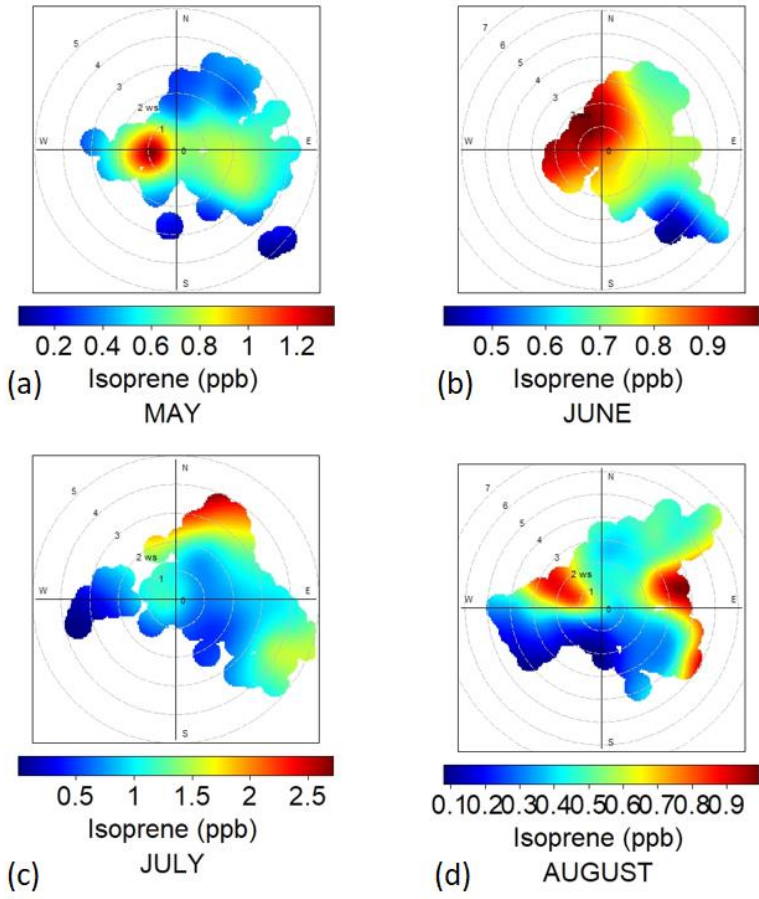

Figure S6. Isoprene polar plots for each month separately; May (a), June (b), July (c) and August (d).

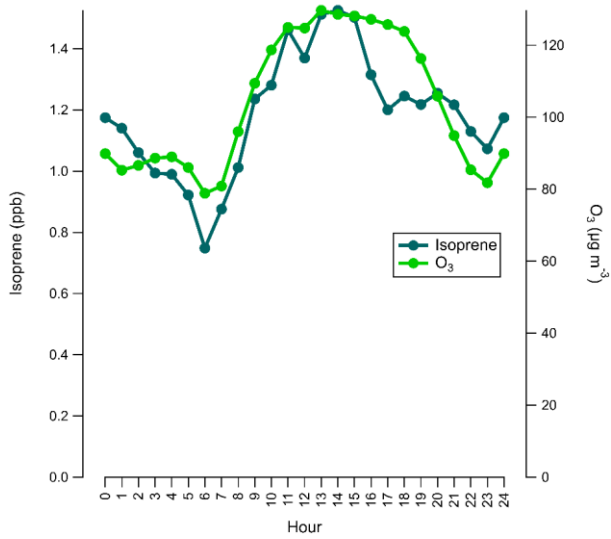

Figure S7. Isoprene diurnal plot with O<sub>3</sub> for July 2023.
